# Supplementary material
Source: PubMed Central journal article supplement (PMC2945226)
Supplement: NIHMS223570-supplement-all_supp_data.pdf [file NIHMS223570-supplement-all_supp_data.pdf]

## Supplementary Materials for

### **The Origins of Sexually Transmitted HIV Among Men Who Have Sex with Men**

David M. Butler, Wayne Delport, Sergei L. Kosakovsky Pond, Malcolm K. Lakdawala, Pok Man Cheng, Susan J. Little, Douglas D. Richman, Davey M. Smith\*

\*To whom correspondence should be addressed. E-mail: davey@ucsd.edu

Published 10 February 2010, *Sci. Transl. Med.* **2**, 18re1 (2010)  
DOI: 10.1126/scitranslmed.3000447

#### **This PDF file includes:**

Table S1. Genetic differentiation between compartments.

Table S2. Estimated divergence times of compartments.

Table S3. Number of purifying ( $dN/dS < 1$ ) and positive ( $dN/dS > 1$ ) selection sites.

Table S4. Inferred substitutions along transmission branches for pairs A, E, and F (panel A) and along pretransmission branches for all pairs A to K (panel B).

Table S5. Marginal likelihoods, estimated as the harmonic mean of the sampled likelihoods in Bayesian MCMC analysis.

Fig. S1. Maximum likelihood phylogenetic tree of viral sequences from a source who infected multiple partners at two independent time points.

Fig. S2. Posterior distributions of parameters sampled during Bayesian MCMC analyses.

Fig. S3. Site-specific nonsynonymous ( $dN$ ) and synonymous ( $dS$ ) rates of substitution.

References

## Supporting Online Material

Table S1: Genetic differentiation between compartments

| Transmission Pair |          | Intra-individual |                  |                  | Inter-individual |                  |                  |
|-------------------|----------|------------------|------------------|------------------|------------------|------------------|------------------|
|                   |          | SBP-SSP          | SBP-SSC          | SSP-SSC          | SBP-RBP          | SSP-RBP          | SSC-RBP          |
| A                 | $F_{st}$ | 0.842            | 0.727            | 0.707            | 0.827            | 0.549            | 0.692            |
|                   | sd       | 0.019            | 0.030            | 0.042            | 0.020            | 0.022            | 0.046            |
|                   | $P$      | <b>&lt;0.001</b> | <b>&lt;0.001</b> | <b>&lt;0.001</b> | <b>&lt;0.001</b> | <b>&lt;0.001</b> | <b>&lt;0.001</b> |
| B                 | $F_{st}$ | 0.034            | 0.995            | 0.993            | -0.010           | 0.045            | 0.996            |
|                   | sd       | 0.046            | 0.002            | 0.002            | 0.037            | 0.046            | 0.002            |
|                   | $P$      | 0.203            | <b>&lt;0.001</b> | <b>&lt;0.001</b> | 0.501            | 0.112            | <b>&lt;0.001</b> |
| C                 | $F_{st}$ | 0.010            | 0.992            | 0.991            | -0.012           | -0.008           | 0.990            |
|                   | sd       | 0.086            | 0.004            | 0.003            | 0.060            | 0.117            | 0.004            |
|                   | $P$      | 0.309            | <b>&lt;0.001</b> | <b>&lt;0.001</b> | 0.518            | 0.526            | <b>&lt;0.001</b> |
| D                 | $F_{st}$ | 0.004            | 0.579            | 0.563            | 0.156            | 0.132            | 0.460            |
|                   | sd       | 0.027            | 0.057            | 0.060            | 0.072            | 0.077            | 0.078            |
|                   | $P$      | 0.324            | <b>&lt;0.001</b> | <b>&lt;0.001</b> | 0.07             | 0.084            | <b>&lt;0.001</b> |
| E                 | $F_{st}$ | -0.081           | 0.698            | 0.702            | 0.216            | 0.384            | 0.693            |
|                   | sd       | 0.104            | 0.076            | 0.077            | 0.129            | 0.035            | 0.073            |
|                   | $P$      | 0.441            | <b>&lt;0.001</b> | <b>&lt;0.001</b> | <b>&lt;0.001</b> | <b>&lt;0.001</b> | <b>&lt;0.001</b> |
| F                 | $F_{st}$ | 0.449            | 0.821            | 0.784            | 0.376            | 0.088            | 0.760            |
|                   | sd       | 0.121            | 0.035            | 0.032            | 0.123            | 0.047            | 0.035            |
|                   | $P$      | <b>&lt;0.001</b> | <b>&lt;0.001</b> | <b>&lt;0.001</b> | <b>&lt;0.001</b> | <b>0.021</b>     | <b>&lt;0.001</b> |

Legend:  $F_{st}$ : Pair-wise measures of genetic distance; SBP: Source Blood Plasma; SSP: Source Seminal Plasma; SSC: Source Seminal Cells; RBP: Recipient Blood Plasma, sd: bootstrapped estimates of the standard deviation of the mean,  $P$ : probability that a random assortment of sequences between compartments/individuals has equal or greater  $F_{st}$ , and values <0.05 are bolded. Significant  $P$  values with Bonferroni correction for multiple comparisons ( $P < 0.008$ ) are in italics.

Table S2: Estimated divergence times of compartments

| Pair | Compartments Investigated | $T_{MRCA}$                             | Standard error                  | ESS    | P     |
|------|---------------------------|----------------------------------------|---------------------------------|--------|-------|
| A    | RBP-SBP                   | 1006.48 (161.78, 1463.68) <sup>#</sup> | 63.54 (0.34, 1.05) <sup>#</sup> | 358.70 | 0.999 |
|      | RBP-SSP                   | 242.14                                 | 13.79                           | 562.86 |       |
|      | RBP-SSC                   | 1437.88                                | 30.42                           | 345.04 |       |
| B    | RBP-SBP                   | 1155.96                                | 7.05                            | 397.25 | 0.972 |
|      | RBP-SSP                   | 1168.37                                | 7.05                            | 416.37 |       |
|      | RBP-SSC                   | 1453.66                                | 29.8                            | 262.91 |       |
| C    | RBP-SBP                   | 1156.79                                | 7.12                            | 392.75 | 0.974 |
|      | RBP-SSP                   | 1168.86                                | 7.09                            | 412.24 |       |
|      | RBP-SSC                   | 1453.77                                | 29.8                            | 262.78 |       |
| D    | RBP-SBP                   | 58.86                                  | 4.47                            | 280.93 | 0.999 |
|      | RBP-SSP                   | 58.85                                  | 4.48                            | 280.88 |       |
|      | RBP-SSC                   | 61.01                                  | 5.18                            | 254.11 |       |
| E    | RBP-SBP                   | 465.35                                 | 16.41                           | 372.81 | 0.999 |
|      | RBP-SSP                   | 127.82                                 | 2.046                           | 657.79 |       |
|      | RBP-SSC                   | 502.96                                 | 18.06                           | 360.53 |       |

Legend:  $T_{MRCA}$ : Time to Most Recent Common Ancestor was estimated (S1) in days between source and recipient viral populations in the 5 transmission pairs for which time of infection could reliably be estimated; SBP: Source Blood Plasma HIV RNA; SSP: Source Seminal Plasma HIV RNA; SSC: Source Seminal Cell-associated HIV DNA; RBP: Recipient Blood Plasma HIV RNA; ESS: Effective Sample Size; P is the posterior probability that  $T_{MRCA}$  (RBP-SSP)  $\leq$   $T_{MRCA}$  (RBP-SSC). <sup>#</sup>Multiple runs failed to converge on the estimates of time to the most recent common ancestor. The means and standard errors of both modes are thus presented.

**Table S3:** Number of purifying ( $dN/dS < 1$ ) and positive ( $dN/dS > 1$ ) selection sites

| Transmission<br>Pair | FEL         |             | iFEL        |             | FEL & iFEL  |             |
|----------------------|-------------|-------------|-------------|-------------|-------------|-------------|
|                      | $dN/dS < 1$ | $dN/dS > 1$ | $dN/dS < 1$ | $dN/dS > 1$ | $dN/dS < 1$ | $dN/dS > 1$ |
| <u>A</u>             | 6           | 2           | 8           | 2           | 5           | 2           |
| <u>B</u>             | 3           | 0           | 3           | 0           | 2           | 0           |
| <u>C</u>             | 2           | 0           | 1           | 0           | 1           | 0           |
| <u>D</u>             | 10          | 0           | 4           | 0           | 4           | 0           |
| <u>E</u>             | 8           | 0           | 7           | 0           | 3           | 0           |
| <u>F</u>             | 14          | 4           | 11          | 6           | 11          | 4           |

Legend: FEL: Fixed Effects Likelihood inference of selection at individual sites across all lineages; iFEL: Fixed Effects Likelihood inference of selection at individual sites along internal branches; dN: non-synonymous rate, dS: synonymous rate. FEL results indicate sites experiencing significant ( $P < 0.05$ ) positive/purifying selection along all lineages, whereas iFEL results are only at internal branches.

Table S4: Inferred substitutions along transmission branches for pairs A, E and F (panel A) and along pre-transmission branches for all pairs A-K (panel B).

| <b>Panel A</b>       |           | <b>Transmission Pairs (codon substitutions with aa)</b> |                    |                    |                    |
|----------------------|-----------|---------------------------------------------------------|--------------------|--------------------|--------------------|
| <u>hxb2 position</u> | <u>aa</u> | <u>A</u>                                                | <u>E</u>           | <u>F(1)*</u>       | <u>F(2)*</u>       |
| 285                  | I         |                                                         | CTA(L) ><br>TTA(L) |                    |                    |
| 299                  | P         | CTC(L) ><br>CTT(L)                                      |                    |                    |                    |
| 301                  | N         | AAC(N) ><br>AAT(N)                                      |                    |                    |                    |
| 324                  | --        |                                                         |                    |                    |                    |
| 329                  | Q         | CAA(Q) ><br>AAA(K)                                      |                    |                    | CAA(Q) ><br>CGA(R) |
| 342                  | N         |                                                         |                    | AAC(N) ><br>GAC(D) |                    |
| 345                  | K         |                                                         |                    | AAA(K) ><br>ACA(T) |                    |
| 347                  | I         |                                                         |                    |                    | ATA(I) ><br>GTA(V) |

| <b>Panel B</b>       |           | <b>Transmission Pairs (codon substitutions with aa)</b> |                    |                    |                    |                    |                    |
|----------------------|-----------|---------------------------------------------------------|--------------------|--------------------|--------------------|--------------------|--------------------|
| <u>hxb2 position</u> | <u>aa</u> | <u>A</u>                                                | <u>B</u>           | <u>C</u>           | <u>D</u>           | <u>E</u>           | <u>F</u>           |
|                      |           |                                                         |                    |                    |                    |                    |                    |
| 252                  | R         |                                                         |                    |                    |                    |                    | AGG(R) ><br>AAG(K) |
| 259                  | L         |                                                         |                    |                    | TTG(L) ><br>CTG(L) |                    |                    |
| 260                  | L         |                                                         |                    |                    |                    |                    | CTG(L) ><br>CTA(L) |
| 261                  | L         |                                                         |                    |                    |                    |                    | TTA(L) ><br>TTG(L) |
| 269                  | E         | GAG(E) ><br>GGG(G)                                      |                    |                    |                    | GGG(G) ><br>GAG(E) |                    |
| 270                  | V         |                                                         |                    |                    |                    |                    | GTA(V) ><br>GTC(V) |
| 271                  | V         |                                                         |                    |                    |                    |                    | ATA(I) ><br>ATG(M) |
| 272                  | I         |                                                         |                    |                    |                    | GTT(V) ><br>ATT(I) |                    |
| 275                  | V         |                                                         | GCC(A) ><br>GTC(V) |                    |                    |                    | GAG(E) ><br>GAA(E) |
| 276                  | N         |                                                         |                    |                    |                    | AAC(N) ><br>AAT(N) |                    |
| 277                  | F         |                                                         |                    |                    |                    |                    | TTC(F) ><br>CTC(L) |
| 278                  | T         | ACG(T) ><br>TCG(S)                                      | TCG(S) ><br>ACG(T) | TCG(S) ><br>ACG(T) |                    | ACA(T) ><br>ACG(T) |                    |

|     |   |                    |                    |                    |                    |                    |                    |
|-----|---|--------------------|--------------------|--------------------|--------------------|--------------------|--------------------|
| 279 | D | GAC(D) ><br>AAC(N) | AAC(N) ><br>GAC(D) | AAC(N) ><br>GAC(D) |                    |                    |                    |
| 283 | T |                    |                    |                    | ACA(T) ><br>ACC(T) |                    | ACC(T) ><br>AAC(N) |
| 285 | I |                    |                    |                    |                    | CTA(L) ><br>ATA(I) |                    |
| 287 | Q |                    |                    |                    |                    |                    | CAG(Q) ><br>CAT(H) |
| 288 | L |                    |                    |                    | CTA(L) ><br>CTG(L) |                    |                    |
| 290 | T |                    |                    |                    |                    | AAC(N) ><br>AAA(K) | GAG(E) ><br>CAG(Q) |
| 293 | E | GAA(E) ><br>GTA(V) | GTA(V) ><br>GAA(E) | GTA(V) ><br>GAA(E) | CCC(P) ><br>AAA(K) |                    | AAA(K) ><br>ACA(T) |
| 295 | N |                    |                    |                    | CAT(H) ><br>AAT(N) |                    |                    |
| 296 | C |                    |                    |                    | TGC(C) ><br>TGT(C) |                    |                    |
| 297 | T |                    |                    |                    | ATA(I) ><br>ACA(T) |                    |                    |
| 299 | P | CCC(P) ><br>CTC(L) | CTC(L) ><br>CCC(P) | CTC(L) ><br>CCC(P) |                    |                    | CCC(P) ><br>CCT(P) |
| 300 | N |                    |                    |                    |                    | GGC(G) ><br>AAC(N) | AAC(N) ><br>AAT(N) |
| 305 | K |                    |                    |                    |                    | AAG(K) ><br>AAA(K) |                    |
| 306 | R | AGT(S) ><br>GGT(G) | GGT(G) ><br>AGT(S) | GGT(G) ><br>AGT(S) |                    |                    |                    |
| 308 | R |                    | CAT(H) ><br>CGT(R) |                    | CCT(P) ><br>CAT(H) |                    |                    |
| 318 | V |                    |                    |                    |                    |                    | TTT(F) ><br>TAT(Y) |
| 322 | K | GAA(E) ><br>GCC(A) |                    |                    | GAC(D) ><br>GAA(E) | GAT(D) ><br>GAA(E) |                    |
| 323 | I |                    |                    | GTA(V) ><br>ATA(I) |                    |                    |                    |
| 324 | - |                    | GTA(V) ><br>ATA(I) |                    |                    |                    |                    |
| 329 | Q |                    | AAA(K) ><br>CAA(Q) | AAA(K) ><br>CAA(Q) |                    |                    |                    |
| 331 | H |                    |                    |                    |                    |                    | CAT(H) ><br>CAC(H) |
| 332 | C |                    |                    |                    |                    |                    | TGT(C) ><br>TGC(C) |
| 334 | I | ATT(I) ><br>CTT(L) | CTT(L) ><br>ATT(I) | CTT(L) ><br>ATT(I) |                    |                    |                    |
| 335 | S |                    |                    |                    | ACT(T) ><br>AGT(S) |                    |                    |
| 336 | R |                    |                    |                    |                    | AGT(S) ><br>AGA(R) | AGA(R) ><br>GGG(G) |
| 337 | A |                    | ACA(T) ><br>GCA(A) |                    |                    | ACA(T) ><br>GCA(A) | GCA(A) ><br>GAA(E) |
| 338 | K |                    | GAA(E) ><br>AAA(K) |                    | AAT(N) ><br>AAA(K) |                    |                    |
| 340 | N |                    |                    |                    | ACT(T) ><br>AAT(N) |                    |                    |
| 341 | - |                    |                    |                    | ACT(T) ><br>AAC(N) |                    |                    |
| 342 | N |                    |                    |                    | AGC(S) ><br>ACT(T) |                    |                    |
| 345 | K | AAA(K) ><br>GAA(E) | GAA(E) ><br>AAA(K) |                    | CAA(Q) ><br>AAA(K) | GAA(E) ><br>AAA(K) |                    |
| 346 | Q |                    |                    |                    | CTG(L) ><br>CAG(Q) |                    | CAG(Q) ><br>AAG(K) |
| 348 | A |                    |                    |                    |                    | GTT(V) ><br>GCT(A) |                    |
| 349 | S |                    | AAA(K) ><br>AGA(R) |                    | GCA(A) ><br>AGA(R) |                    | AGA(R) ><br>ACA(T) |

|     |   |                    |                    |  |                    |                    |                    |
|-----|---|--------------------|--------------------|--|--------------------|--------------------|--------------------|
| 351 | L |                    |                    |  |                    | TTG(L) ><br>TTA(L) |                    |
| 352 | R |                    |                    |  | GGA(G) ><br>AGA(R) |                    | AAA(K) ><br>CAA(Q) |
| 353 | E |                    |                    |  |                    |                    | GAA(E) ><br>AAA(K) |
| 354 | Q |                    |                    |  |                    |                    | CAA(Q) ><br>GAA(E) |
| 355 | F | TTT(F) ><br>TAC(Y) | TAC(Y) ><br>TTT(F) |  | TAT(Y) ><br>TTT(F) |                    | TTT(F) ><br>TTC(F) |
| 358 | N |                    |                    |  | AAC(N) ><br>AAT(N) |                    |                    |
| 359 | K |                    |                    |  | GCA(A) ><br>AAA(K) |                    |                    |
| 362 | I | ATC(I) ><br>GTC(V) |                    |  |                    |                    | ATC(I) ><br>GTC(V) |
| 364 | K |                    |                    |  |                    | AAT(N) ><br>AAG(K) |                    |

Legend: aa: one letter amino acid code; -: indel; >: substitution direction. \*Transmission pair F had two potential transmission branches leading to each of two clades containing both source and recipient virus (see Figure 1).

Table S5: Marginal likelihoods, estimated as the harmonic mean of the sampled likelihoods in Bayesian MCMC analysis (S1).

| Substitution model | Demographic model      | Marginal likelihood |
|--------------------|------------------------|---------------------|
| GTR+ $\Gamma$      | Constant coalescent    | -1145.29 $\pm$ 0.16 |
| GTR+ $\Gamma$      | Exponential coalescent | -1148.15 $\pm$ 0.18 |
| GTR+ $\Gamma$      | Bayesian Skyline       | -1145.27 $\pm$ 0.18 |
| SRD06              | Constant coalescent    | -1146.27 $\pm$ 0.16 |
| SRD06              | Exponential coalescent | -1146.64 $\pm$ 0.16 |
| SRD06              | Bayesian Skyline       | -1144.46 $\pm$ 0.18 |



Figure Legends

Figure S1: Maximum likelihood phylogenetic tree of viral sequences from a source who infected multiple partners at two independent time points.

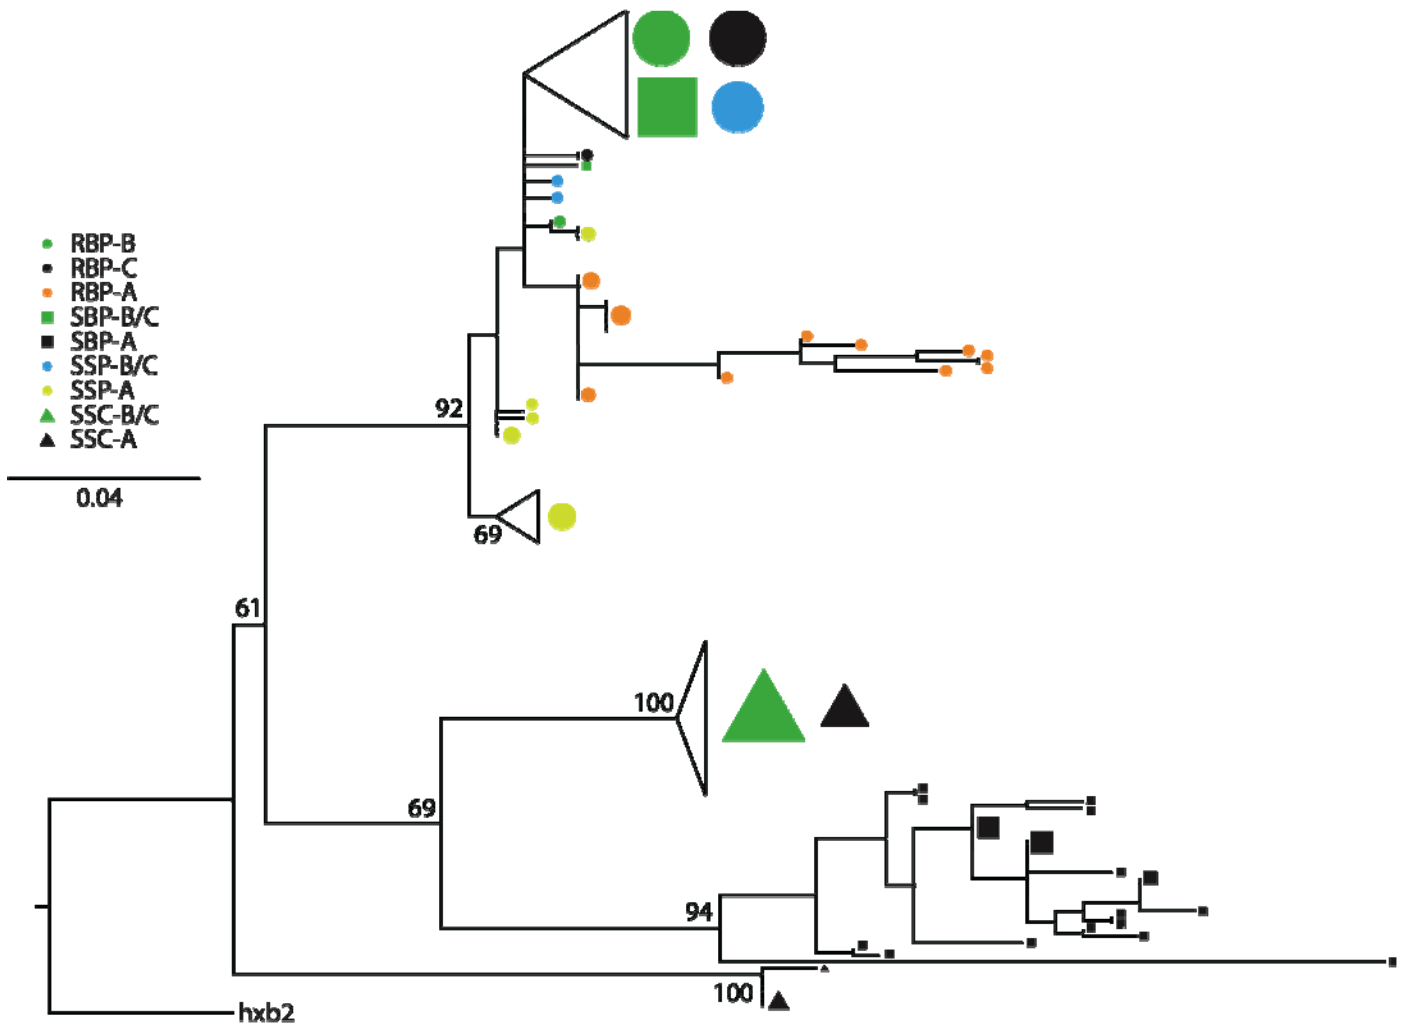

Legend: RBP: recipient HIV RNA in blood plasma, SBP: source HIV RNA in blood plasma, SSP: source HIV RNA in seminal plasma, SSC: source seminal cell-associated virus. B/C: first time point corresponding to transmission pairs B & C; A: second time point corresponding to transmission pair A.

Figure S2: Posterior distributions of parameters sampled during Bayesian MCMC analyses (S1).

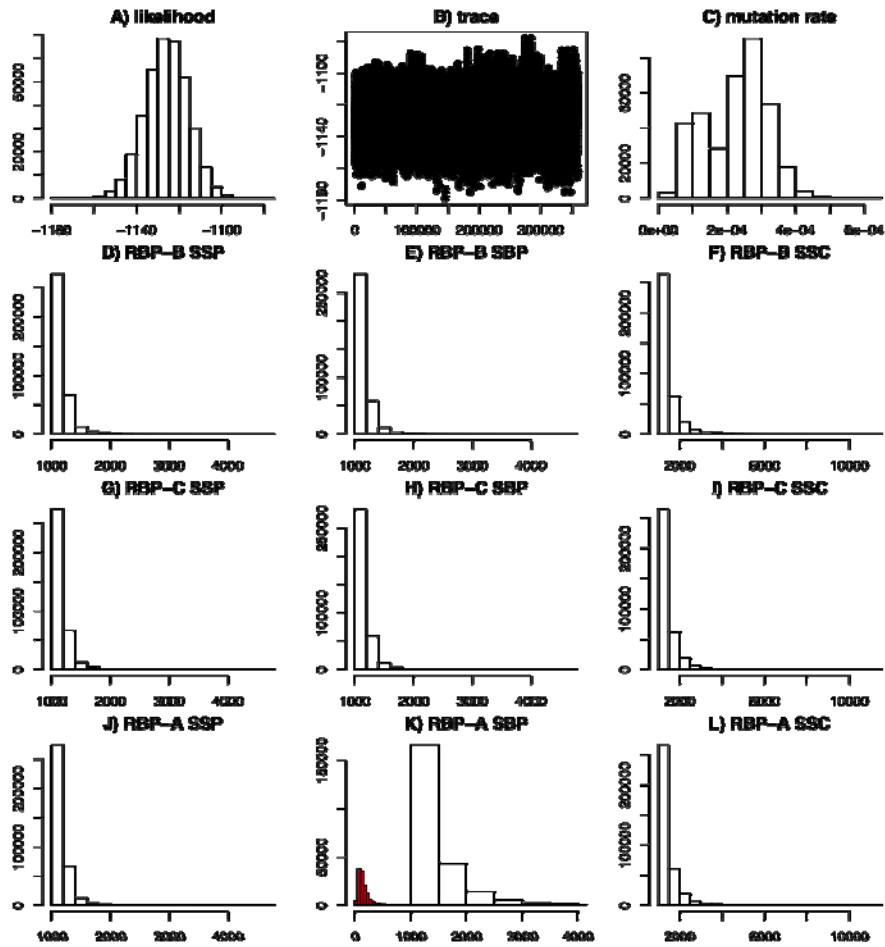

Legend: As in Fig S1

Figure S3: Site-specific non-synonymous (dN) and synonymous (dS) rates of substitution.

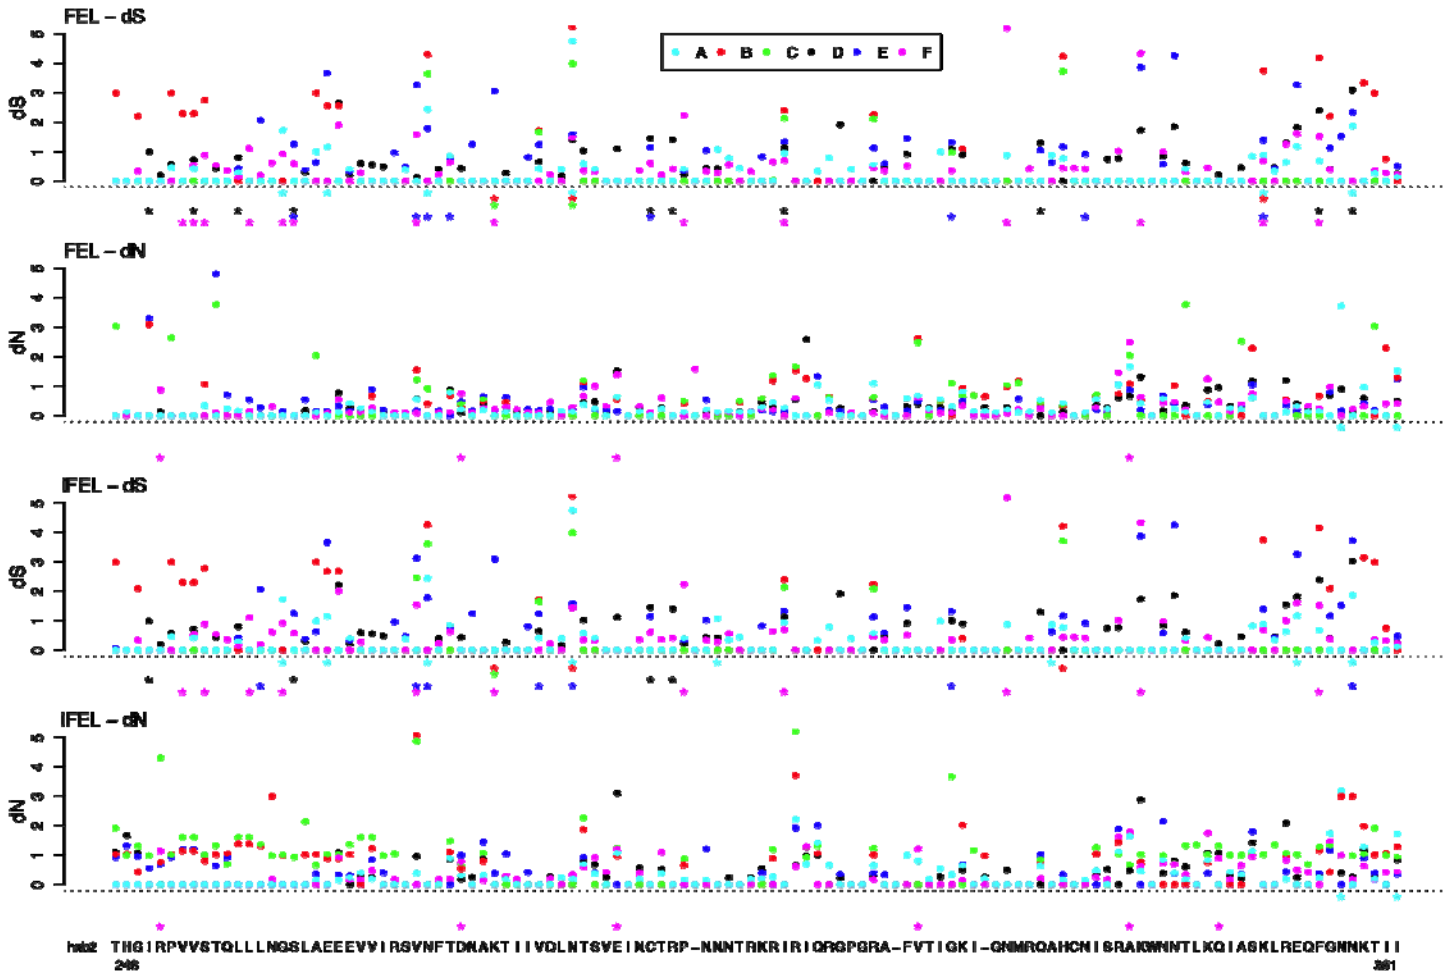

Legend: FEL: Fixed Effects Likelihood; and iFEL: Internal Fixed Effects Likelihood. Estimated rates for each of the transmission pairs (A-F) are shown, with asterisks (\*) below plots indicating sites with significant ( $P < 0.05$ ) purifying ( $dS$  plots) or diversifying ( $dN$  plots) selection.

References

## References

S1. A. J. Drummond, A. Rambaut, BEAST: Bayesian evolutionary analysis by sampling trees *BMC Evol Biol* **7**, 214 (2007).
